# Supplementary material for: Midwives’ Integration of Post-Abortion Manual Vacuum Aspiration in the Democratic Republic of Congo: A Mixed Methods Case Study &amp; Positive Deviance Assessment
Source: Research Square preprint supplement (doi:10.21203/rs.3.rs-59473/v2), 2020-11-09
Supplement: Supplementary file 1 [file 4e07864868b8cbc287bd19e2.docx]

**SAGE-FEMME et L’INTÉGRATION DE L’AMIU**

**PROTOCOLE DE L’ENTRETIEN**

| Intervieweur-euse : ____________________________________  Strate échantillonnale :  Intégrée AMIU □  Non-Intégrée AMIU □ |
| --- |
| Nom de la personne interrogée : ____________________________________  Lieu de l’entretien : ____________________________________  Date de l’entretien : ____________________________________  Heure du début de l’entretien : ____________________________________ |

Rappeler à la personne interviewée que l’entretien est enregistré, mais qu’il sera anonymisé.

*Merci d’avoir bien voulu collaborer à cette enquête.*

*L’entretien comporte deux parties :*

*Le premier port sur votre expérience avec l’intégration de l’AMIU depuis votre formation de SONU.*

*Le deuxième vous invite à fournir des informations sur vous-même.*

*Merci.*

**Première partie : entretien semi-directif**

1. Avez-vous pratiqué l’AMIU depuis la formation SONU ?

1. ***Si non, pourquoi ?***
2. Selon toi, est-ce que c’est important que la sage-femme pratique l’AMIU ?
3. Aimerais-tu pratiquer l’AMIU ? Pourquoi ?
4. Est-ce que autre sages-femmes dans votre institut pratiquent l’AMIU ? Décrivez ce que tu observes d’elles ?
5. *Avez-vous observer ou assisté avec l’AMIU depuis la formation SONU ? Décrivez .*
6. Selon toi, quels sont les éléments ou stratégies qui pourrais te faciliter à pratiquer l’AMIU ?
7. Selon toi, quels sont les éléments qui t’inhibent à mettre en œuvre l’intégration de l’AMIU?
8. Discutez pour un moment votre niveau de confiance pour effectuer l’AMIU. Quels sont les éléments qui impactent votre confiance à effectuer l’AMIU ?
9. Comment résoudre le problème de l’avortement clandestin en RDC.
10. Discuter vos idées du rôle de la sage-femme au sujet de l’avortement clandestin en RDC.

**Deuxième partie : questions d’ordre sociodémographique**

1. Province de votre établissement : 🞎 Kinshasa 🞎 Kongo Central 🞎 autre
2. Type d’établissement : 🞎 SONU-C 🞎 SONU-B
3. Affiliation de l’établissement : 🞎 privé 🞎 publique 🞎 Confessionnelle 🞎 autre
4. Établissement urbain ou rural : 🞎 Urbain 🞎 rurale
5. Catégorie professionnelle : 🞎 Sage-femme (A1) 🞎 Sage-femme (A3) 🞎 Sage-femme (A2) 🞎 Infirmière 🞎 autres
6. Est-ce que tu enseignes ? 🞎 oui 🞎 non
7. Depuis combien de temps que vous soyez formées comme sage-femme?

🞎 Moins que 5 ans 🞎 6 ans à 15 ans 🞎 plus que 15 ans

1. Âge : 🞎 20-29 ans 🞎 30-39 ans 🞎 40-49 ans 🞎 50-59 ans 🞎 60-69 ans
2. Masculin 🞎 Féminin 🞎
